# Supplementary material for: Variations in Triterpenoid Deposition in Cuticular Waxes during Development and Maturation of Selected Fruits of Rosaceae Family
Source: PubMed Central journal article supplement (PMC7767361; doi:10.3390/ijms21249762), 2020-12-21
Supplement: ijms-21-09762-s001.pdf [file ijms-21-09762-s001.pdf]

**Table S1.** Retention times and characteristic ions of mass spectra of identified steroids and triterpenoids

| Range of Retention Time           | Compound                                 | Mass Spectrum <i>m/z</i> (Relative Intensity)                                                                                                                                                                 |
|-----------------------------------|------------------------------------------|---------------------------------------------------------------------------------------------------------------------------------------------------------------------------------------------------------------|
| 31.8–32.0                         | Cholesterol                              | 386 (26), 107 (50), 105 (48), 91 (57), 81 (54), 79 (46), 69 (47), 57 (87), 55 (73), 43 (100), 41 (55)                                                                                                         |
| 34.4–34.5                         | Campesterol                              | 400 (30), 107 (51), 105 (55), 95 (49), 83 (45), 81 (64), 71 (62), 57 (77), 55 (77), 43 (100), 41 (52)                                                                                                         |
| 35.5–35.6                         | Stigmasterol                             | 412 (36), 145 (64), 107 (52), 95 (100), 83 (66), 81 (90), 78 (60), 69 (67), 67 (85), 55 (69)                                                                                                                  |
| 37.4–37.6                         | Sitosterol                               | 414 (29), 145 (54), 107 (59), 105 (60), 95 (54), 91 (49), 81 (57), 57 (68), 55 (70), 43 (100), 41 (44)                                                                                                        |
| 37.6–37.8                         | Sitostanol                               | 416 (31), 215 (82), 109 (58), 107 (83), 95 (81), 93 (64), 81 (84), 69 (60), 57 (64), 55 (81), 43 (100)                                                                                                        |
| 38.1–38.2                         | Cycloartanol                             | 428 (4), 205 (60), 109 (98), 95 (100), 93 (64), 81 (69), 69 (78), 57 (73), 55 (82), 43 (89), 41 (67)                                                                                                          |
| 38.6–38.8                         | $\beta$ -Amyrin                          | 426 (27), 219 (18), 218 (100), 203 (49), 189 (17), 135 (11), 109 (13), 105 (12), 95 (15), 81 (18), 69 (14)                                                                                                    |
| 40.0–40.2                         | $\alpha$ -Amyrenone                      | 424 (12), 219 (19), 218 (100), 203 (24), 189 (16), 135 (19), 133 (18), 122 (18), 119 (17), 95 (16), 55 (18)                                                                                                   |
| 40.4–40.8                         | $\alpha$ -Amyrin/<br>Lupeol              | 426 (4), 218 (100), 203 (20), 189 (36), 135 (35), 121 (32), 109 (32), 107 (34), 95 (40), 81 (33), 55 (31)<br>426 (18), 207 (67), 189 (90), 135 (83), 121 (80) 109 (85), 121 (80), 95 (100), 93 (87), 81 (86), |
| 40.9–41.1                         | Tremulone (stigmasta-3,5-dien-7-one)     | 410 (32), 187 (27), 174 (100), 161 (37), 159 (26), 91 (28), 57 (28), 55 (37), 43 (44), 41 (28)                                                                                                                |
| 42.0–42.2                         | Sitostenone                              | 412 (37), 229 (34), 218 (31), 124 (100), 109 (31), 95 (41), 81 (27), 69 (32), 55 (37), 43 (44)                                                                                                                |
| 48.3–48.5                         | Oleanolic aldehyde                       | 440 (2), 232 (28), 207 (20), 204 (39), 203 (100), 189 (29), 105 (18), 81 (19), 69 (20), 55 (29)                                                                                                               |
| 51.4–51.6                         | Ursolic aldehyde                         | 440 (1), 207 (26), 204 (23), 203 (100), 133 (42), 119 (18), 105 (18), 95 (18), 81 (18), 55 (18), 43 (20)                                                                                                      |
| 53.2–53.4                         | Erythrodiol                              | 442 (1), 204 (17), 203 (100), 133 (7), 119 (9), 105 (8), 95 (9), 93 (8), 81 (8), 69 (9), 55 (8)                                                                                                               |
| 56.3–56.5                         | Uvaol                                    | 442 (1), 207 (13), 204 (17), 203 (100), 133 (33), 119 (13), 105 (11), 95 (12), 81 (10), 69 (10), 55 (11)                                                                                                      |
| 57.8–58.0                         | Betulin                                  | 442 (8), 203 (100), 189 (77), 133 (66), 121 (55), 107 (57), 105 (49), 95 (56), 93 (54), 81 (67)                                                                                                               |
| Acids analyzed after methylation: |                                          |                                                                                                                                                                                                               |
| 42.0–42.2                         | Olean-2,12-dien-28-oic acid methyl ester | 452(11), 425 (9), 263 (11), 262 (61), 221 (14), 203 (100), 190 (15), 189 (22), 133 (14), 119 (12)                                                                                                             |
| 44.5–44.8                         | Ursa-2,12-dien-28-oic acid methyl ester  | 452 (12), 425 (9), 263 (20), 262 (100), 221 (27), 203 (79), 190 (18), 189 (27), 133 (58), 119 (23)                                                                                                            |
| 45.3–45.5                         | 3-Oxo-olean-12-en-28-oic                 | 468 (6), 262 (32), 204 (17), 203 (100), 202 (21), 189                                                                                                                                                         |

|           |                                          |                                                                                                             |
|-----------|------------------------------------------|-------------------------------------------------------------------------------------------------------------|
|           | acid methyl ester                        | (29),133 (17), 119 (14), 105 (12), 55 (12)                                                                  |
| 46.0–46.6 | Oleanolic acid methyl ester              | 470 (1), 262 (48), 207 (13), 204 (16), 203 (100), 202 (21), 189 (22), 133 (17), 119 (13), 105 (14)          |
| 46.6–47.2 | Betulinic acid methyl ester              | 470 (5), 207 (41), 203 (38), 189 (100), 175 (40), 119 (41), 107 (38), 105 (37), 95 (37), 93 (38)            |
| 47.5–48.0 | 3-Oxo-urs-12-en-28-oic acid methyl ester | 468 (3), 263 (21), 262 (96), 249 (20), 204 (17), 203 (100), 189 (29), 133 (79), 119 (30), 105 (19)          |
| 49.0–51.0 | Ursolic acid methyl ester                | 470 (1), 263 (20), 262 (100), 207 (32), 203 (93), 189 (29), 133 (76), 119 (34), 105 (21), 95 (18)           |
| 60.0–61.0 | Maslinic acid methyl ester               | 486 (2), 263 (10), 262 (53), 204 (17), 203 (100), 202 (20), 189 (20), 133 (16), 119 (13), 105 (12), 69 (10) |
| 63.0–64.0 | Corosolic acid methyl ester              | 486 (1), 263 (15), 262 (74), 204 (17), 203 (100), 202 (22), 189 (21), 119 (18), 105 (14), 55 (12)           |
| 73.0–74.0 | Pomolic acid methyl ester                | 486 (3) 263 (12), 263 (55), 204 (16), 203 (100), 202 (20), 189 (17), 119 (12), 105 (10), 75 (14)            |

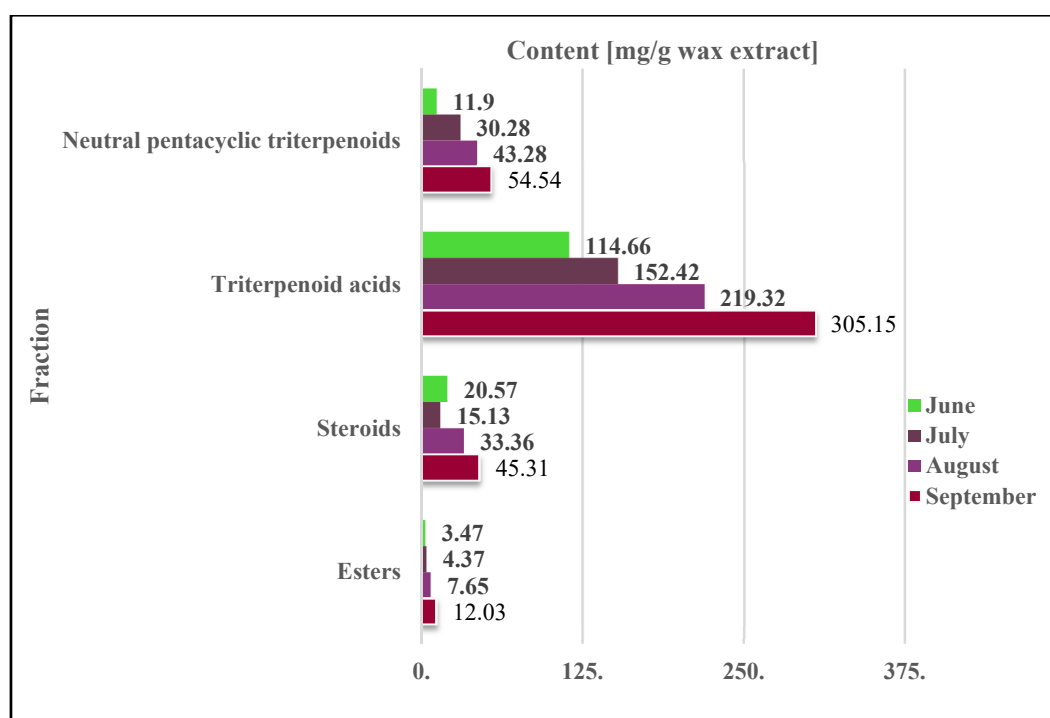

**Figure S1.** Changes in the content of triterpenoids in cuticular waxes during rugosa rose *Rosa rugosa* fruit development.

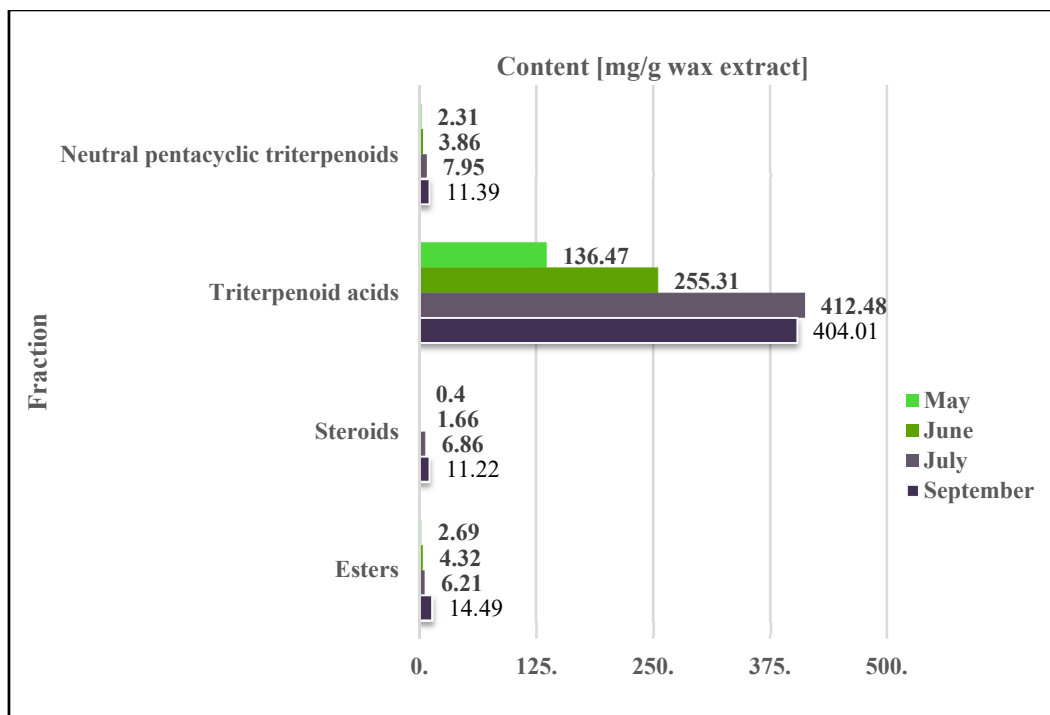

**Figure S2.** Changes in the content of triterpenoids in cuticular waxes during black chokeberry *Aronia melanocarpa* var. Galicjanka fruit development.

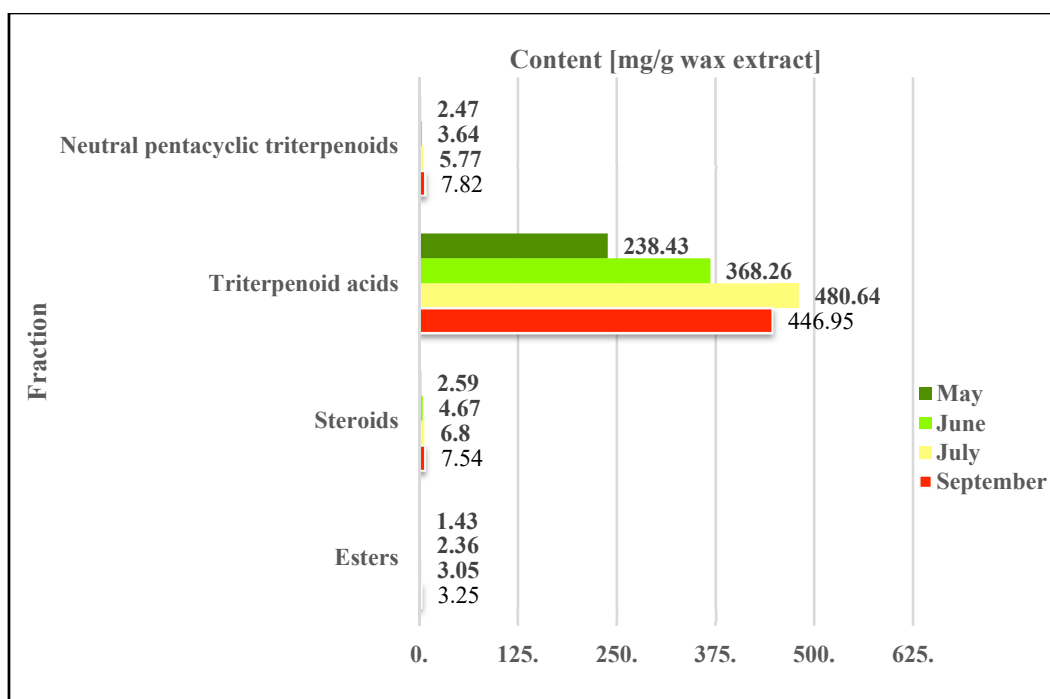

**Figure S3.** Changes in the content of triterpenoids in cuticular waxes during apple *Malus domestica* var. Antonovka fruit development.
